# Supplementary material for: Age, Period, and Cohort Effects on Suicide Mortality in South Korea, 1992–2015
Source: MDPI journal article supplement (doi:10.3390/ijerph15081580), 2018-07-25
Supplement: s1 [file s1]

**Table S1.** The birth cohort effects on suicide for males and females according to three period drift

| Birth year | Male                  |      |      | Female |      |      |
|------------|-----------------------|------|------|--------|------|------|
|            | Period drift (%/year) |      |      |        |      |      |
|            | 0.0                   | 3.7  | 7.4  | 0.0    | 3.7  | 7.4  |
| 1911       | 0.12                  | 0.65 | 3.38 | 0.08   | 0.48 | 2.68 |
| 1912       | 0.13                  | 0.67 | 3.36 | 0.09   | 0.51 | 2.72 |
| 1913       | 0.13                  | 0.69 | 3.33 | 0.10   | 0.53 | 2.77 |
| 1914       | 0.14                  | 0.71 | 3.31 | 0.11   | 0.56 | 2.82 |
| 1915       | 0.15                  | 0.73 | 3.29 | 0.12   | 0.59 | 2.86 |
| 1916       | 0.16                  | 0.75 | 3.26 | 0.13   | 0.62 | 2.91 |
| 1917       | 0.17                  | 0.77 | 3.24 | 0.14   | 0.66 | 2.96 |
| 1918       | 0.19                  | 0.79 | 3.22 | 0.15   | 0.69 | 3.01 |
| 1919       | 0.20                  | 0.81 | 3.20 | 0.16   | 0.73 | 3.06 |
| 1920       | 0.21                  | 0.84 | 3.17 | 0.18   | 0.77 | 3.11 |
| 1921       | 0.22                  | 0.86 | 3.15 | 0.20   | 0.80 | 3.16 |
| 1922       | 0.24                  | 0.89 | 3.13 | 0.21   | 0.84 | 3.20 |
| 1923       | 0.26                  | 0.91 | 3.11 | 0.23   | 0.88 | 3.23 |
| 1924       | 0.27                  | 0.94 | 3.08 | 0.25   | 0.92 | 3.25 |
| 1925       | 0.29                  | 0.96 | 3.06 | 0.27   | 0.95 | 3.24 |
| 1926       | 0.31                  | 0.99 | 3.03 | 0.28   | 0.98 | 3.21 |
| 1927       | 0.33                  | 1.01 | 3.00 | 0.30   | 0.99 | 3.16 |
| 1928       | 0.35                  | 1.03 | 2.96 | 0.31   | 1.00 | 3.08 |
| 1929       | 0.37                  | 1.06 | 2.92 | 0.33   | 1.00 | 2.97 |
| 1930       | 0.39                  | 1.08 | 2.87 | 0.33   | 0.99 | 2.83 |
| 1931       | 0.41                  | 1.09 | 2.82 | 0.34   | 0.97 | 2.67 |
| 1932       | 0.43                  | 1.11 | 2.76 | 0.34   | 0.93 | 2.49 |
| 1933       | 0.45                  | 1.12 | 2.69 | 0.34   | 0.90 | 2.32 |
| 1934       | 0.47                  | 1.13 | 2.62 | 0.34   | 0.87 | 2.16 |
| 1935       | 0.49                  | 1.13 | 2.54 | 0.34   | 0.84 | 2.01 |
| 1936       | 0.51                  | 1.13 | 2.45 | 0.34   | 0.82 | 1.90 |
| 1937       | 0.53                  | 1.13 | 2.36 | 0.35   | 0.81 | 1.81 |
| 1938       | 0.55                  | 1.13 | 2.27 | 0.36   | 0.81 | 1.75 |
| 1939       | 0.56                  | 1.12 | 2.18 | 0.38   | 0.81 | 1.70 |
| 1940       | 0.58                  | 1.11 | 2.09 | 0.40   | 0.82 | 1.66 |
| 1941       | 0.59                  | 1.10 | 1.99 | 0.42   | 0.84 | 1.63 |
| 1942       | 0.61                  | 1.09 | 1.90 | 0.44   | 0.85 | 1.59 |
| 1943       | 0.62                  | 1.07 | 1.82 | 0.46   | 0.85 | 1.55 |
| 1944       | 0.64                  | 1.06 | 1.73 | 0.48   | 0.86 | 1.50 |
| 1945       | 0.66                  | 1.05 | 1.66 | 0.50   | 0.86 | 1.45 |
| 1946       | 0.67                  | 1.04 | 1.59 | 0.51   | 0.85 | 1.39 |
| 1947       | 0.69                  | 1.03 | 1.52 | 0.53   | 0.85 | 1.33 |
| 1948       | 0.72                  | 1.03 | 1.46 | 0.54   | 0.84 | 1.28 |

**Table S1.** The birth cohort effects on suicide for males and females according to three period drift (continued)

| Birth year | Male                  |      |      | Female |      |      |
|------------|-----------------------|------|------|--------|------|------|
|            | Period drift (%/year) |      |      |        |      |      |
|            | 0.0                   | 3.7  | 7.4  | 0.0    | 3.7  | 7.4  |
| 1949       | 0.74                  | 1.03 | 1.41 | 0.56   | 0.83 | 1.22 |
| 1950       | 0.77                  | 1.03 | 1.36 | 0.58   | 0.83 | 1.18 |
| 1951       | 0.80                  | 1.03 | 1.32 | 0.59   | 0.83 | 1.13 |
| 1952       | 0.83                  | 1.04 | 1.28 | 0.62   | 0.83 | 1.09 |
| 1953       | 0.87                  | 1.04 | 1.24 | 0.65   | 0.83 | 1.06 |
| 1954       | 0.91                  | 1.05 | 1.21 | 0.68   | 0.84 | 1.04 |
| 1955       | 0.95                  | 1.05 | 1.17 | 0.72   | 0.86 | 1.03 |
| 1956       | 0.98                  | 1.06 | 1.14 | 0.76   | 0.88 | 1.01 |
| 1957       | 1.02                  | 1.06 | 1.10 | 0.81   | 0.90 | 1.00 |
| 1958       | 1.06                  | 1.06 | 1.06 | 0.86   | 0.92 | 0.99 |
| 1959       | 1.10                  | 1.06 | 1.03 | 0.91   | 0.94 | 0.98 |
| 1960       | 1.14                  | 1.06 | 0.99 | 0.96   | 0.96 | 0.96 |
| 1961       | 1.17                  | 1.05 | 0.95 | 1.01   | 0.97 | 0.94 |
| 1962       | 1.21                  | 1.04 | 0.91 | 1.05   | 0.98 | 0.91 |
| 1963       | 1.23                  | 1.03 | 0.86 | 1.09   | 0.98 | 0.88 |
| 1964       | 1.26                  | 1.01 | 0.82 | 1.14   | 0.99 | 0.86 |
| 1965       | 1.28                  | 0.99 | 0.78 | 1.19   | 0.99 | 0.83 |
| 1966       | 1.31                  | 0.98 | 0.74 | 1.24   | 1.00 | 0.81 |
| 1967       | 1.35                  | 0.97 | 0.71 | 1.30   | 1.01 | 0.79 |
| 1968       | 1.39                  | 0.97 | 0.68 | 1.36   | 1.02 | 0.77 |
| 1969       | 1.44                  | 0.97 | 0.66 | 1.43   | 1.03 | 0.75 |
| 1970       | 1.50                  | 0.97 | 0.64 | 1.51   | 1.05 | 0.74 |
| 1971       | 1.55                  | 0.97 | 0.61 | 1.58   | 1.06 | 0.72 |
| 1972       | 1.61                  | 0.97 | 0.59 | 1.67   | 1.08 | 0.71 |
| 1973       | 1.67                  | 0.97 | 0.57 | 1.76   | 1.10 | 0.69 |
| 1974       | 1.73                  | 0.97 | 0.55 | 1.86   | 1.12 | 0.68 |
| 1975       | 1.79                  | 0.97 | 0.53 | 1.97   | 1.14 | 0.67 |
| 1976       | 1.85                  | 0.96 | 0.51 | 2.09   | 1.17 | 0.67 |
| 1977       | 1.90                  | 0.95 | 0.49 | 2.23   | 1.21 | 0.66 |
| 1978       | 1.95                  | 0.94 | 0.47 | 2.39   | 1.24 | 0.66 |
| 1979       | 1.99                  | 0.93 | 0.44 | 2.55   | 1.28 | 0.66 |
| 1980       | 2.03                  | 0.91 | 0.42 | 2.72   | 1.31 | 0.65 |
| 1981       | 2.06                  | 0.89 | 0.40 | 2.87   | 1.34 | 0.64 |
| 1982       | 2.09                  | 0.87 | 0.38 | 3.02   | 1.36 | 0.63 |
| 1983       | 2.11                  | 0.85 | 0.35 | 3.13   | 1.36 | 0.61 |
| 1984       | 2.13                  | 0.83 | 0.33 | 3.22   | 1.35 | 0.58 |
| 1985       | 2.14                  | 0.80 | 0.31 | 3.28   | 1.32 | 0.55 |
| 1986       | 2.15                  | 0.78 | 0.29 | 3.31   | 1.29 | 0.52 |

**Table S1.** The birth cohort effects on suicide for males and females according to three period drift (continued)

| Birth year | Male                  |      |      | Female |      |      |
|------------|-----------------------|------|------|--------|------|------|
|            | Period drift (%/year) |      |      |        |      |      |
|            | 0.0                   | 3.7  | 7.4  | 0.0    | 3.7  | 7.4  |
| 1987       | 2.16                  | 0.75 | 0.27 | 3.32   | 1.25 | 0.48 |
| 1988       | 2.16                  | 0.73 | 0.25 | 3.31   | 1.20 | 0.45 |
| 1989       | 2.16                  | 0.70 | 0.24 | 3.28   | 1.14 | 0.41 |
| 1990       | 2.16                  | 0.68 | 0.22 | 3.24   | 1.09 | 0.38 |
| 1991       | 2.16                  | 0.65 | 0.20 | 3.18   | 1.03 | 0.35 |
| 1992       | 2.16                  | 0.63 | 0.19 | 3.12   | 0.98 | 0.32 |
| 1993       | 2.16                  | 0.60 | 0.18 | 3.05   | 0.92 | 0.29 |
| 1994       | 2.15                  | 0.58 | 0.16 | 2.99   | 0.87 | 0.26 |
| 1995       | 2.15                  | 0.56 | 0.15 | 2.92   | 0.82 | 0.24 |
| 1996       | 2.15                  | 0.54 | 0.14 | 2.85   | 0.77 | 0.22 |
| 1997       | 2.15                  | 0.52 | 0.13 | 2.79   | 0.73 | 0.20 |
| 1998       | 2.15                  | 0.50 | 0.12 | 2.73   | 0.69 | 0.18 |
| 1999       | 2.15                  | 0.48 | 0.11 | 2.67   | 0.65 | 0.16 |
| 2000       | 2.14                  | 0.47 | 0.11 | 2.61   | 0.61 | 0.15 |
| 2001       | 2.14                  | 0.45 | 0.10 | 2.55   | 0.57 | 0.14 |
| 2002       | 2.14                  | 0.43 | 0.09 | 2.49   | 0.54 | 0.12 |
| 2003       | 2.14                  | 0.42 | 0.09 | 2.44   | 0.51 | 0.11 |
| 2004       | 2.14                  | 0.40 | 0.08 | 2.38   | 0.48 | 0.10 |
| 2005       | 2.14                  | 0.39 | 0.07 | 2.33   | 0.45 | 0.09 |
